# Supplementary material for: Substituted Syndecan-2-Derived Mimetic Peptides Show Improved Antitumor Activity over the Parent Syndecan-2-Derived Peptide
Source: MDPI journal article supplement (doi:10.3390/ijms23115888), 2022-05-24

Original images are shown below. Partial images used in the manuscript has been marked in square boxes.

**A**

Original gels presented in Figure 1A

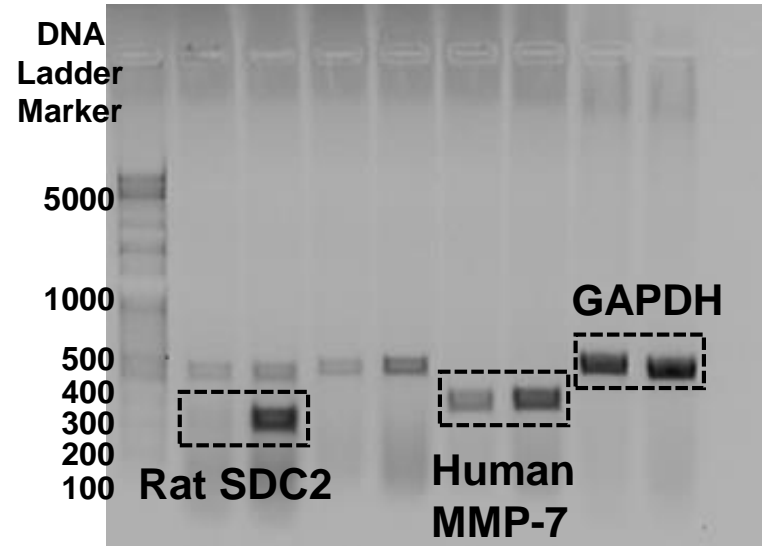

**Rat SDC2**

product length = 283

**Human SDC2**

product length = 540

**Human MMP-7**

product length = 373

**GAPDH**

product length = 598

**B**

Original gels presented in Figure 3C

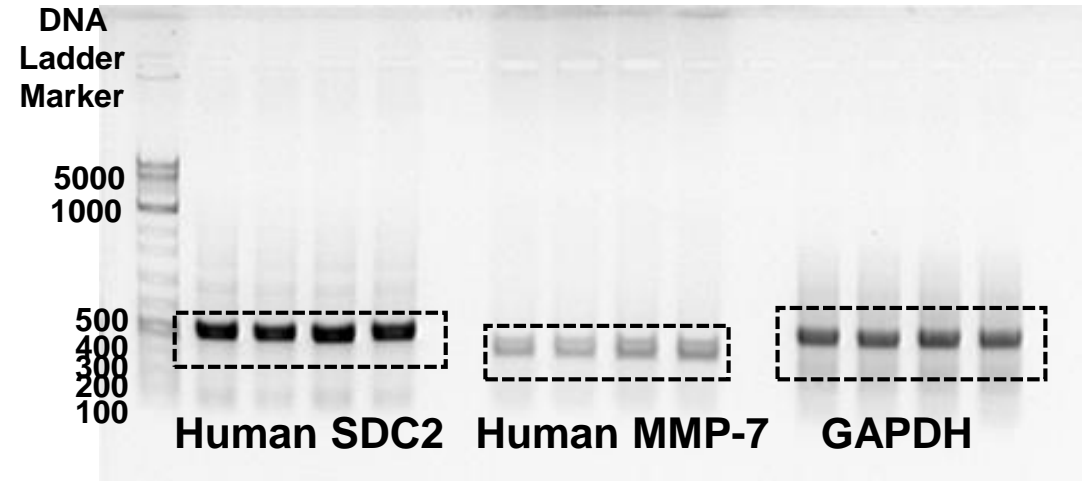

**Full sequence of pro-domain of MMP-7 used for fluorescence assay**

NH<sub>2</sub>-MLPLPQEAGGMSELQWEQAQDYLKRFYLYDSETKNANSLEAKLKEMQKFFGLPITGMLNSRVIEIMQKP  
RCGVDPDVASIY-COOH

Sequence alignment between human and rat SDC2

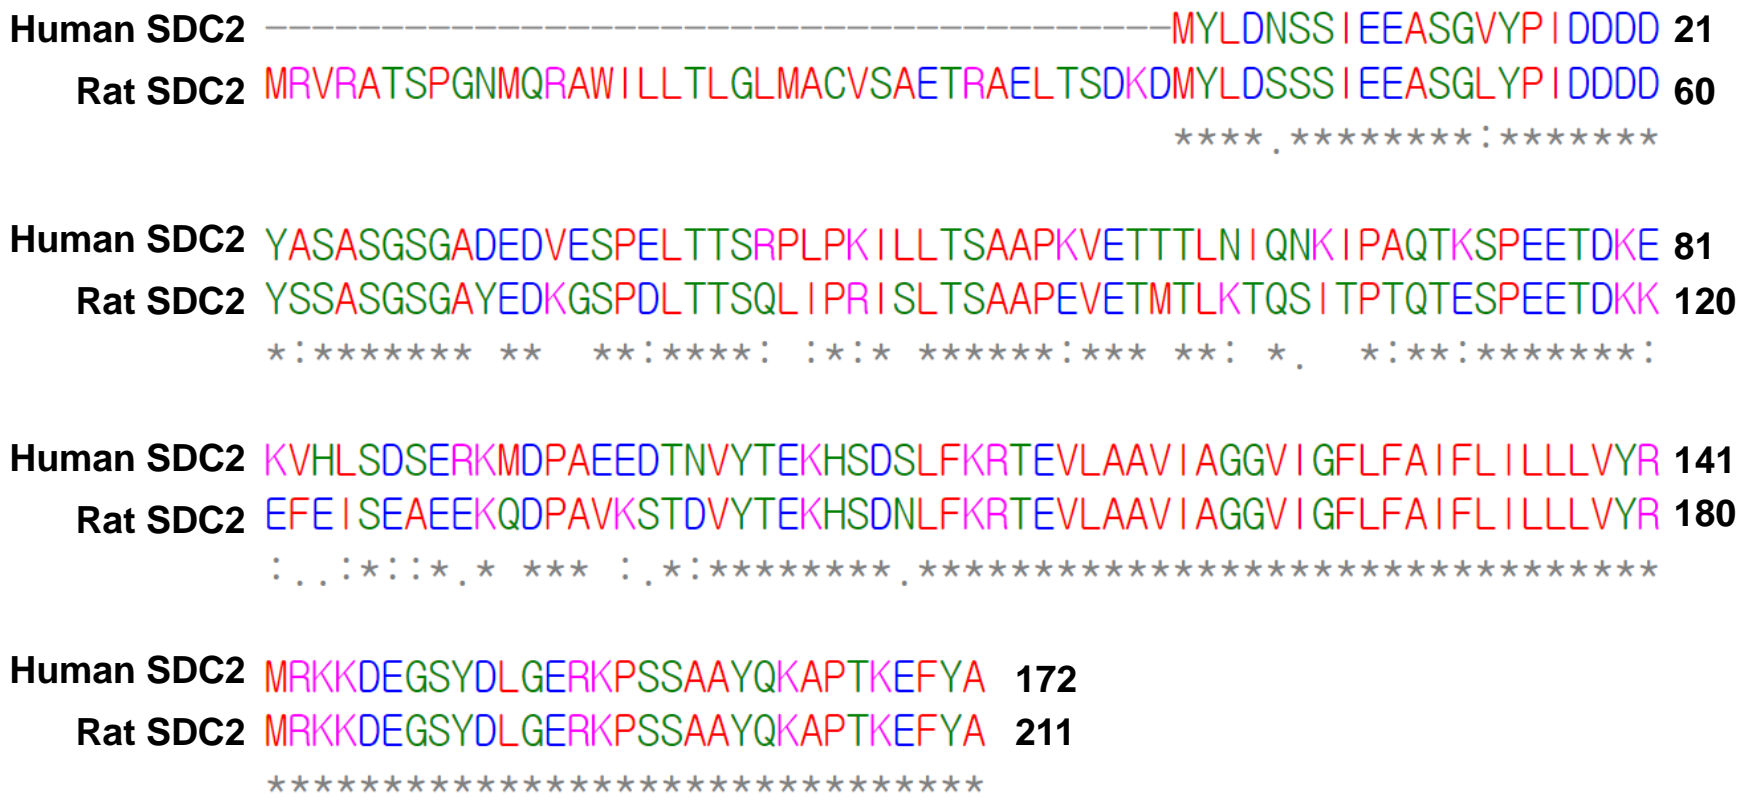

Supplement: s1 [file s1]
